# Supplementary material
Source: PubMed Central journal article supplement (PMC4392179)
Supplement: NIHMS676927-supplement-Supplementary_Information.pdf [file NIHMS676927-supplement-Supplementary_Information.pdf]

## Supplementary Figure Legends

### Supplementary Figure 1

#### <sup>1</sup>H NMR spectrum of MCC950

Representative <sup>1</sup>H NMR spectrum of MCC950 in DMSO-*d*<sub>6</sub> (600 Mhz)

### Supplementary Figure 2

#### <sup>13</sup>C NMR spectrum of MCC950

Representative <sup>13</sup>C NMR spectrum of MCC950 in DMSO-*d*<sub>6</sub> (150 Mhz)

### Supplementary Figure 3

#### COSY NMR spectrum of MCC950

Representative COSY NMR spectrum of MCC950 in DMSO-*d*<sub>6</sub>

### Supplementary Figure 4

#### HSQC NMR spectrum of MCC950

Representative HSQC NMR spectrum of MCC950 in DMSO-*d*<sub>6</sub>

### Supplementary Figure 5

#### HMBC NMR spectrum of MCC950

Representative HMBC NMR spectrum of MCC950 in DMSO-*d*<sub>6</sub>

### Supplementary Figure 6

#### MCC950 inhibits NLRP3 activation in HMDM and PBMC and in BMDM in response to MSU

(a) Production of IL-1 $\beta$  and TNF- $\alpha$  from HMDM stimulated with LPS and ATP and treated with MCC950 (1–1,000 nM) measured by ELISA. Cytokine level is normalized to DMSO control treated cells. Data are expressed as mean  $\pm$  S.E.M of twelve independent experiments carried out in triplicate. Non-linear regression analysis was performed and Log [M] MCC950 vs. normalized response (variable slope) curve is presented. (b) Production of IL-1 $\beta$  and TNF- $\alpha$  from PBMC stimulated with LPS and ATP and treated with MCC950 and glyburide measured by ELISA. Cytokine level is normalized to DMSO control treated cells. Data are expressed as mean  $\pm$  S.E.M of three independent experiments carried out in triplicate. (c) Western blots of cell lysates and supernatants from PBMC stimulated with LPS and ATP and treated with MCC950 or glyburide. (d–g) Production of IL-1 $\beta$ , LDH, IL-1 $\alpha$  and TNF- $\alpha$  from BMDM stimulated with LPS and MSU and treated with MCC950 as measured by ELISA (d,f,g) and LDH assay (e). Data are expressed as mean  $\pm$  S.E.M of three independent experiments carried out in triplicate. (h,i) Production of IL-1 $\beta$  (h) and TNF- $\alpha$  (i) from PBMC treated with MCC950 and

stimulated with LPS for 24 h in full medium. Data are expressed as mean  $\pm$  S.D and are representative of two independent experiments.

### **Supplementary Figure 7**

#### **MCC950 blocks NLRP3-dependent ASC speck formation**

Representative images of ASC-cerulean cells treated with MCC950 and stimulated with nigericin, LeuLeu-Ome and lethal toxin. DRAQ5 nuclear stain (red), ASC-cerulean (green).

### **Supplementary Figure 8**

#### **MCC950 inhibits NLRP3 activation in PBMC from individuals with MWS *ex vivo***

Western blots of cell lysates and supernatants from PBMC isolated from individuals with MWS (with the indicated mutations) stimulated with LPS and treated with MCC950.

### **Supplementary Figure 9**

#### **Pharmacokinetics of MCC950**

Mean plasma concentration of MCC950 after single dose i.v. and p.o. delivery as determined by LC-MS/MS  $n=3$ .

### **Supplementary Table 1**

#### **MCC950 structural assignments**

Structural assignments from NMR Data of MCC950 recorded in DMSO- $d_6$

### **Supplementary Table 2**

#### **Microsomal stability of MCC950**

The half-life ( $T_{1/2}$ ) and % compound remaining after 60 min of MCC950, Testosterone, Diclofenac and Propafenone after incubation with human and mouse liver microsomes.

### **Supplementary Table 3**

#### **CYP substrate preparation**

Details of preparation of substrates for 5 major CYP isozymes.

### **Supplementary Table 4**

#### **Effect of MCC950 on CYP**

The % inhibition of 5 major CYP isozymes by MCC950 and known substrates after incubation with human liver microsomes.

## **Supplementary Table 5**

### **Effect of MCC950 on the hERG channel**

The IC<sub>50</sub> of MCC950 (*n*=3) and amitriptyline (*n*=2) on whole cell hERG currents determined by automated patch clamp method (QPatch<sup>HTX</sup>).

Supplementary Figure 1  
 $^1\text{H}$  NMR spectrum of MCC950

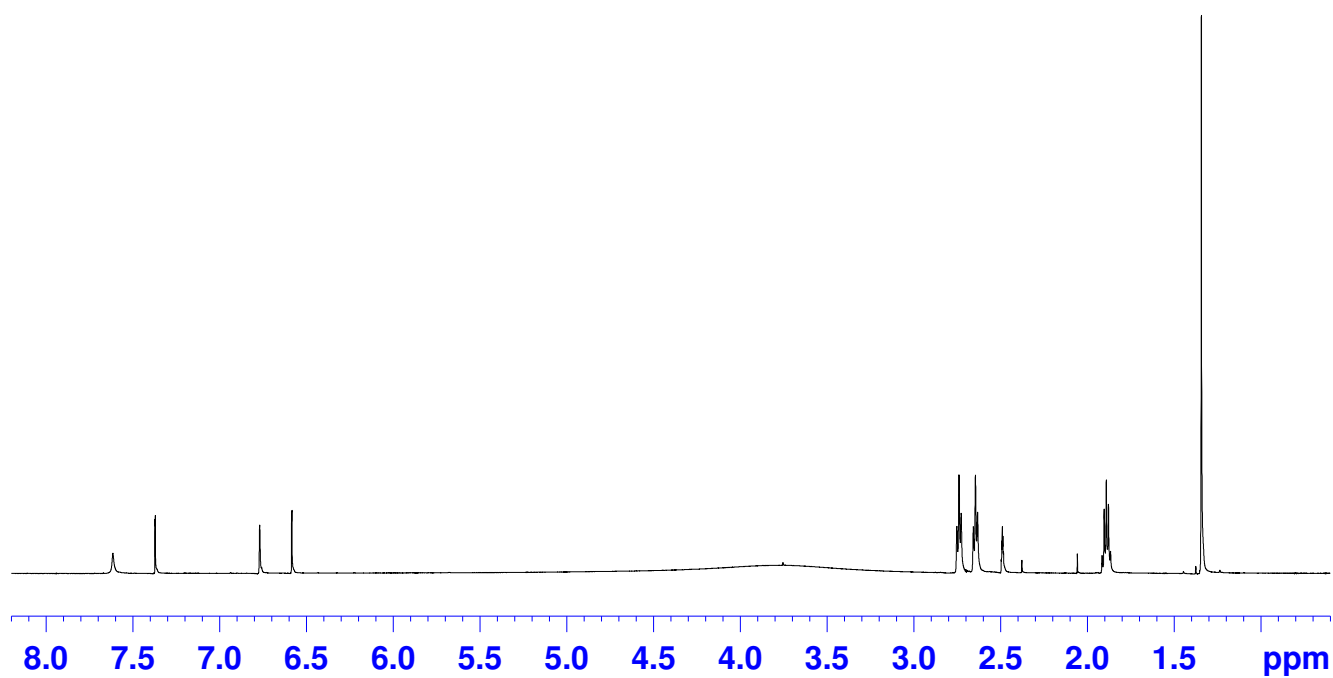

Supplementary Figure 2  
<sup>13</sup>C NMR spectrum of MCC950

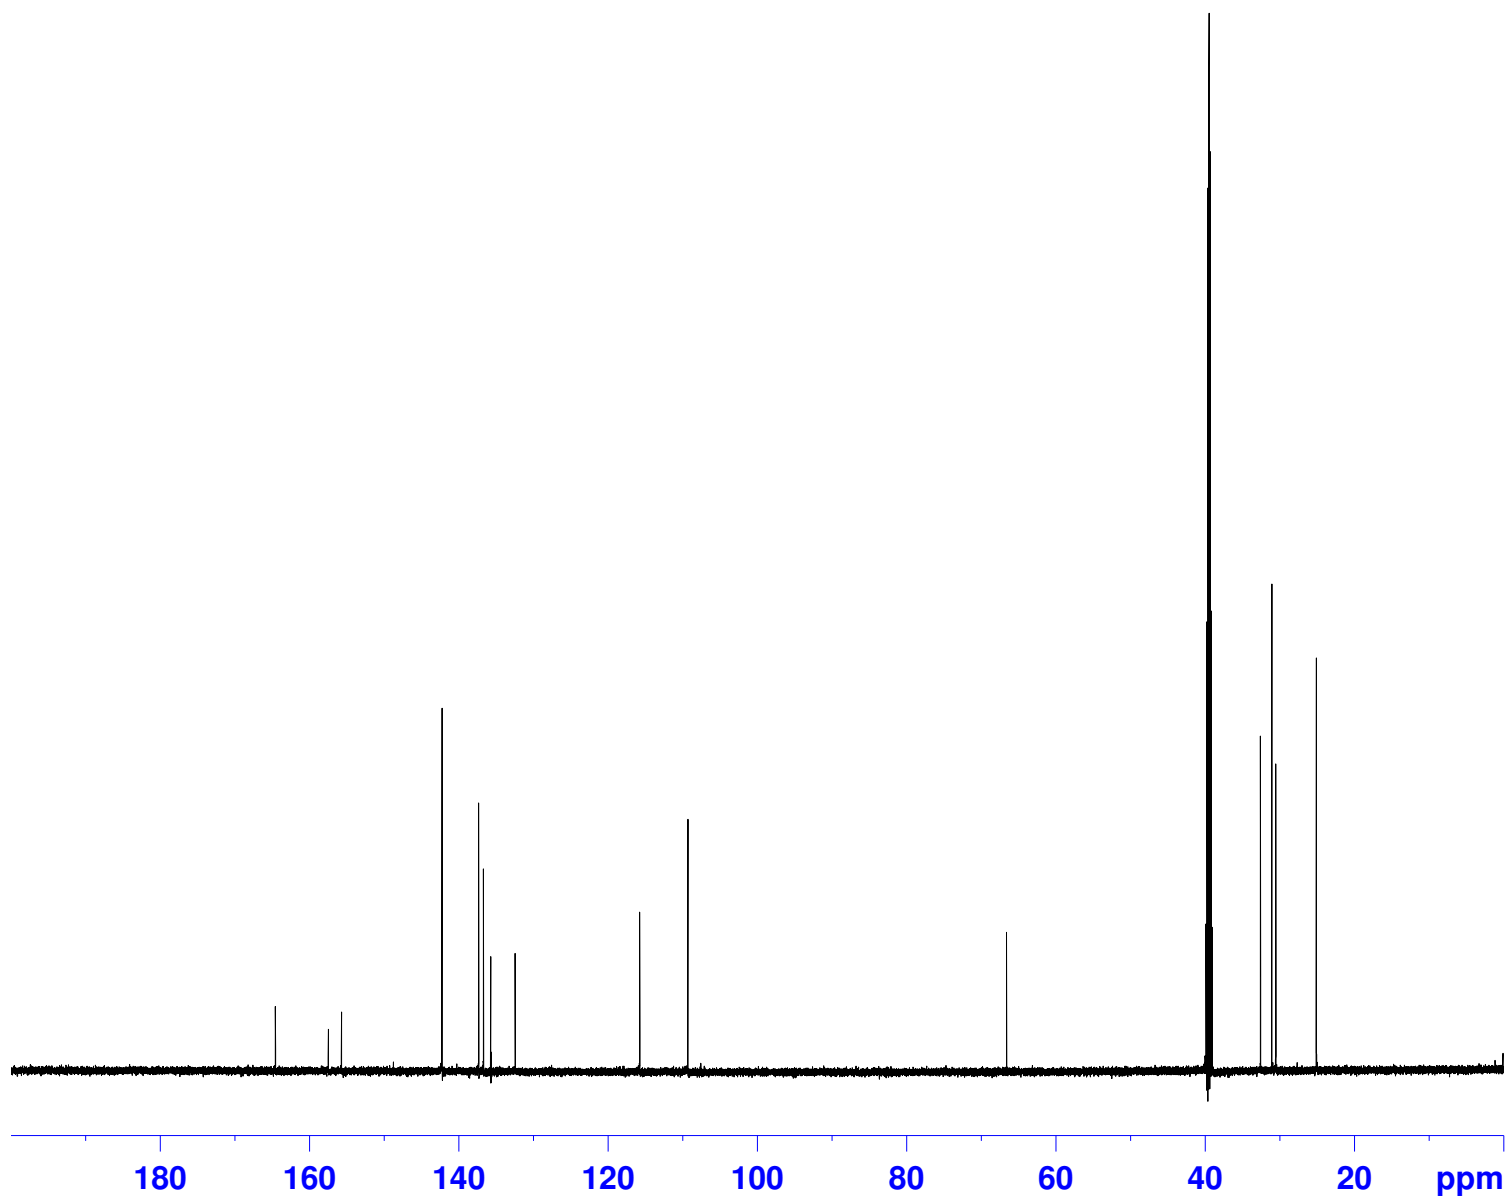

```

NAME          MCC950_004
EXPNO          2
PROCNO         1
Date_          20141021
Time           15.22
INSTRUM        spect
PROBHD         5 mm CPTCI 1H/
PULPROG        zgpg
TD             65536
SOLVENT        DMSO
NS             275
DS             4
SWH            39062.500 Hz
FIDRES         0.596046 Hz
AQ            0.8389236 sec
RG            3649.1
DW            12.800 usec
DE            21.96 usec
TE            298.0 K
D1            1.00000000 sec
D11           0.03000000 sec
TD0           4

```

```

===== CHANNEL f1 =====
NUC1           13C
P1            12.00 usec
PL1           -2.40 dB
PL1W          120.04185486 W
SFO1          150.9194078 MHz

```

```

===== CHANNEL f2 =====
CPDPRG2        waltz16
NUC2           1H
PCPD2          70.00 usec
PL2            2.00 dB
PL12           21.06 dB
PL13           120.00 dB
PL2W           9.65199947 W
PL12W          0.11984429 W
PL13W          0.00000000 W
SFO2          600.1330006 MHz
SI            65536
SF            150.9028756 MHz
WDW            no
SSB            0
LB            0.00 Hz
GB            0
PC            1.00

```

Supplementary Figure 3  
COSY NMR spectrum of MCC950

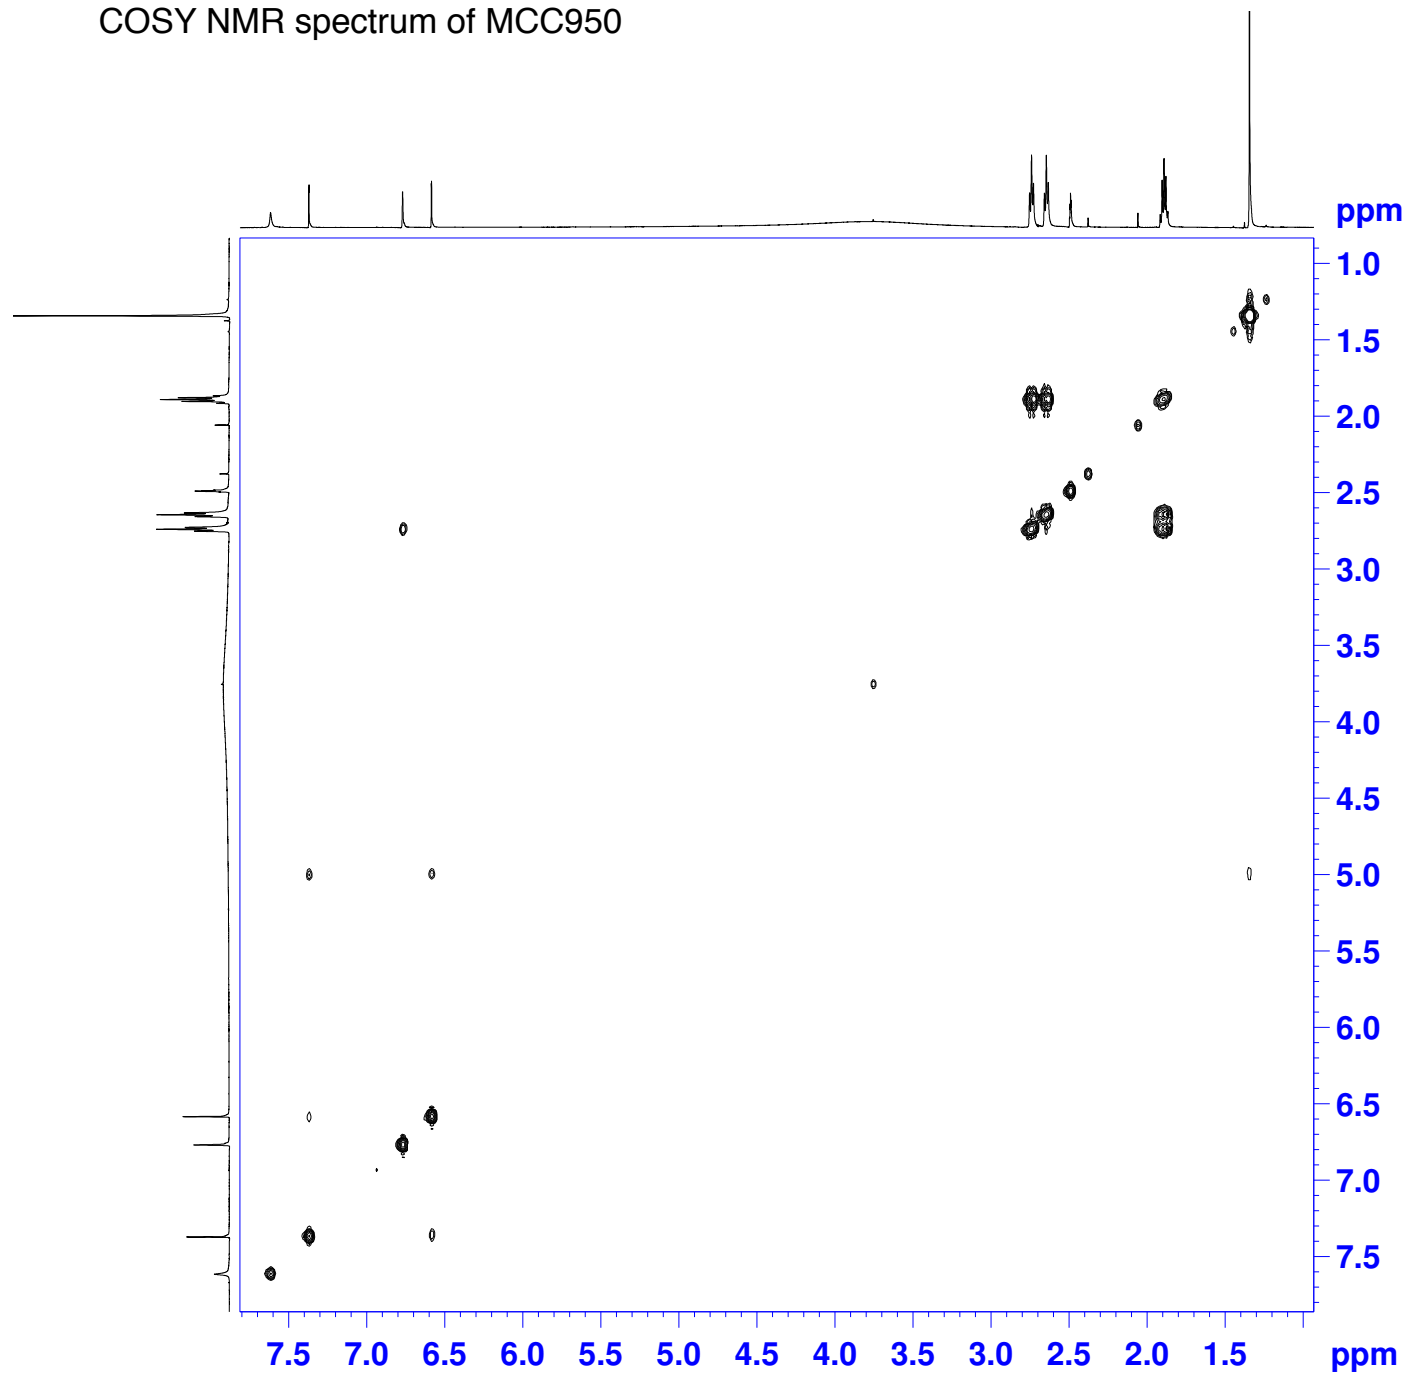

```

NAME          MCC950_004
EXPNO          10
PROCNO         1
Date_          20141021
Time           15.29
INSTRUM        spect
PROBHD         5 mm CPTCI 1H/
PULPROG        cosygpgf
TD             2048
SOLVENT        DMSO
NS              1
DS              8
SWH            7183.908 Hz
FIDRES         3.507768 Hz
AQ             0.1426604 sec
RG             512
DW             69.600 usec
DE             12.00 usec
TE             298.0 K
D0             0.00000300 sec
D1             1.00000000 sec
D13            0.00000400 sec
D16            0.00020000 sec
IN0            0.00013920 sec

===== CHANNEL f1 =====
NUC1            1H
P0              7.80 usec
P1              7.80 usec
PL1             2.00 dB
PL1W            9.65199947 W
SFO1            600.1330006 MHz

===== GRADIENT CHANNEL =====
GPNAM1          sine.100
GPZ1            10.00 %
P16            1000.00 usec
ND0             1
TD             256
SFO1            600.133 MHz
FIDRES         28.062141 Hz
SW             11.971 ppm
FnMODE          QF
SI              1024
SF             600.1299933 MHz
WDW             QSINE
SSB             0
LB             0.00 Hz
GB             0
PC             1.00
SI             1024
MC2            QF
SF             600.1300020 MHz
WDW             QSINE
SSB             0
LB             0.00 Hz
GB             0
  
```

Supplementary Figure 4  
HSQC NMR spectrum of MCC950

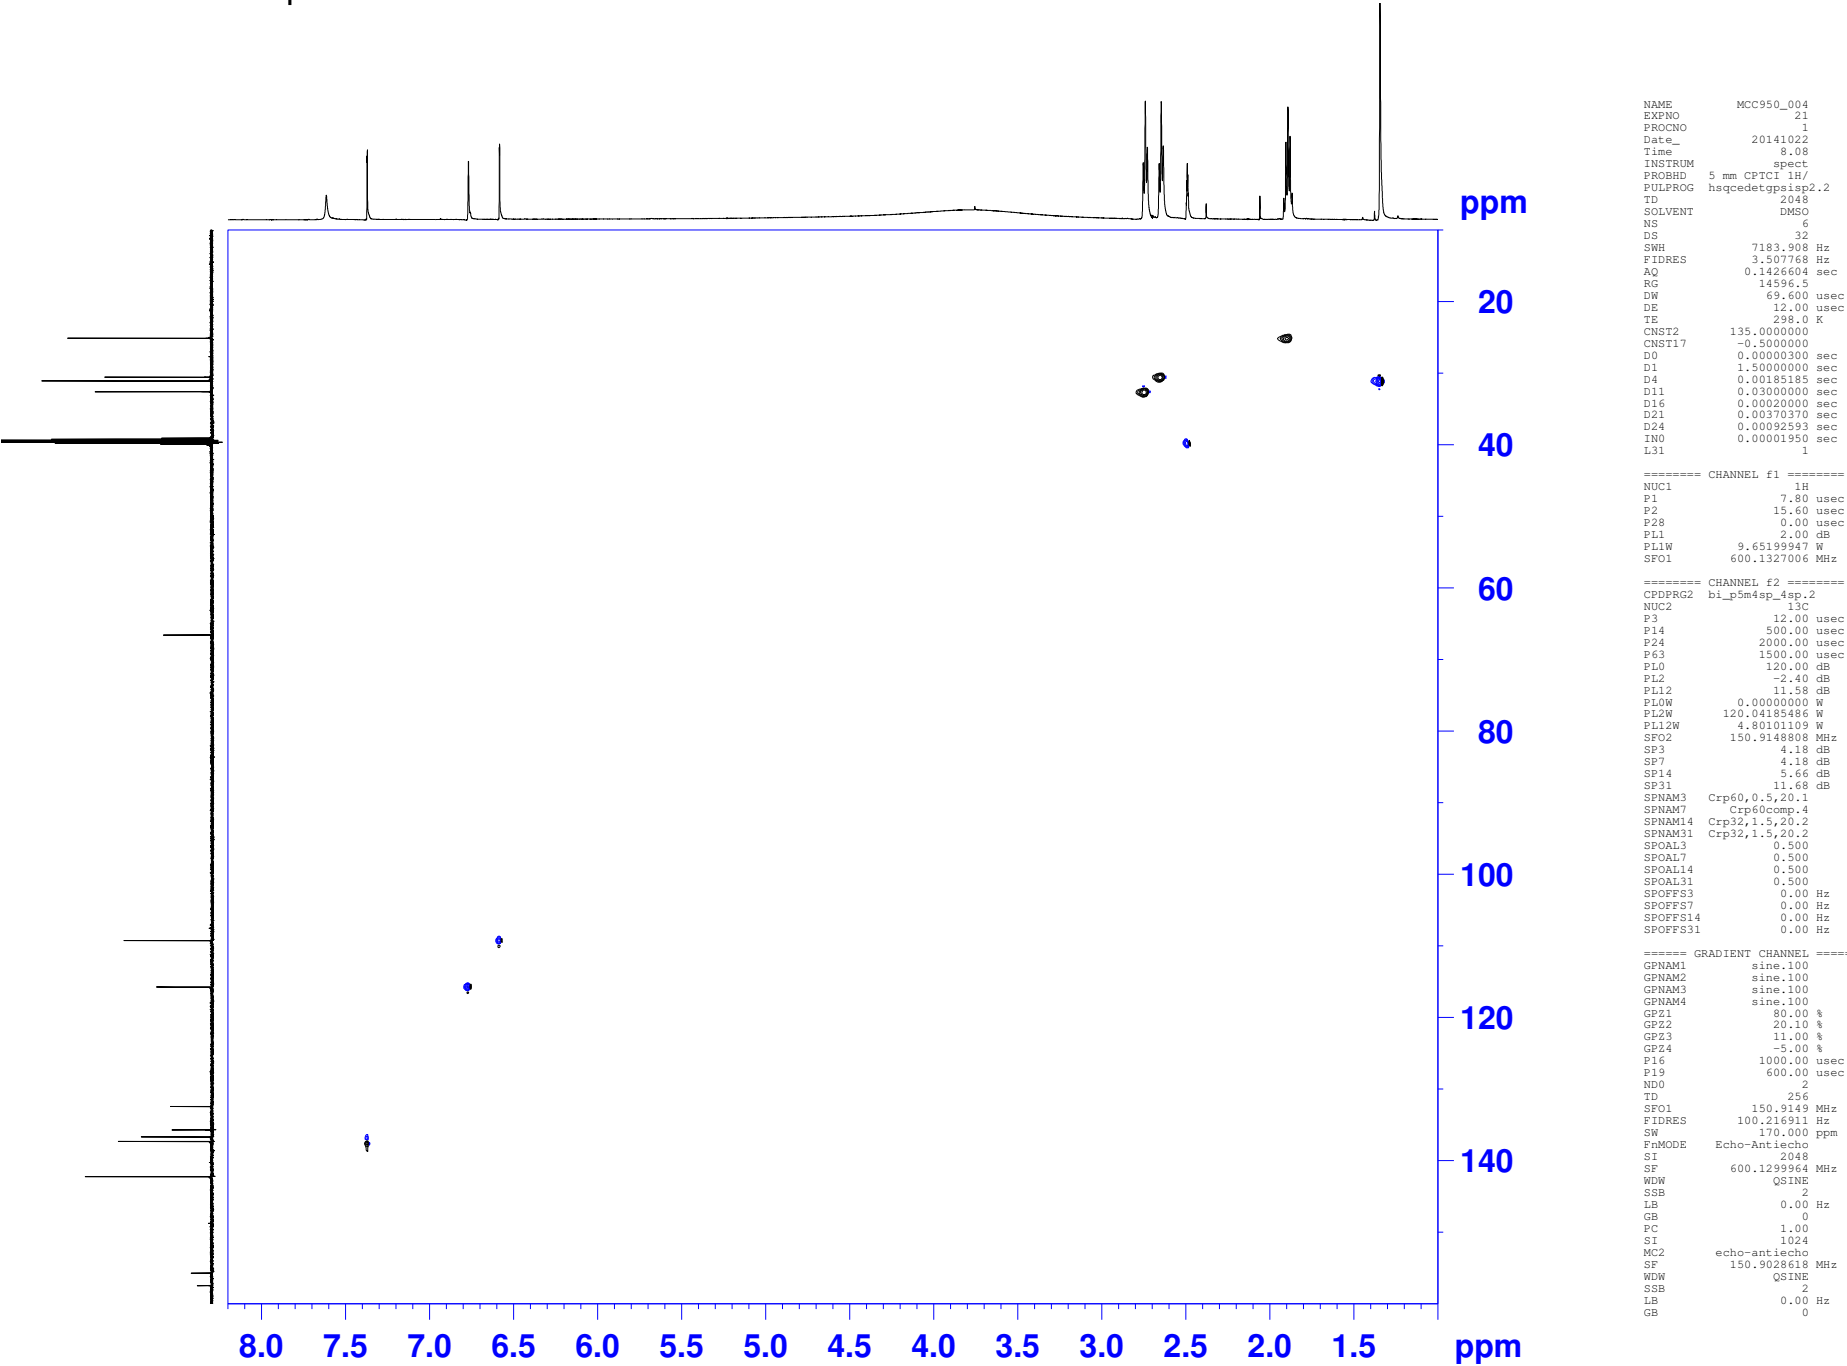

Supplementary Figure 5  
HMBC NMR spectrum of MCC950

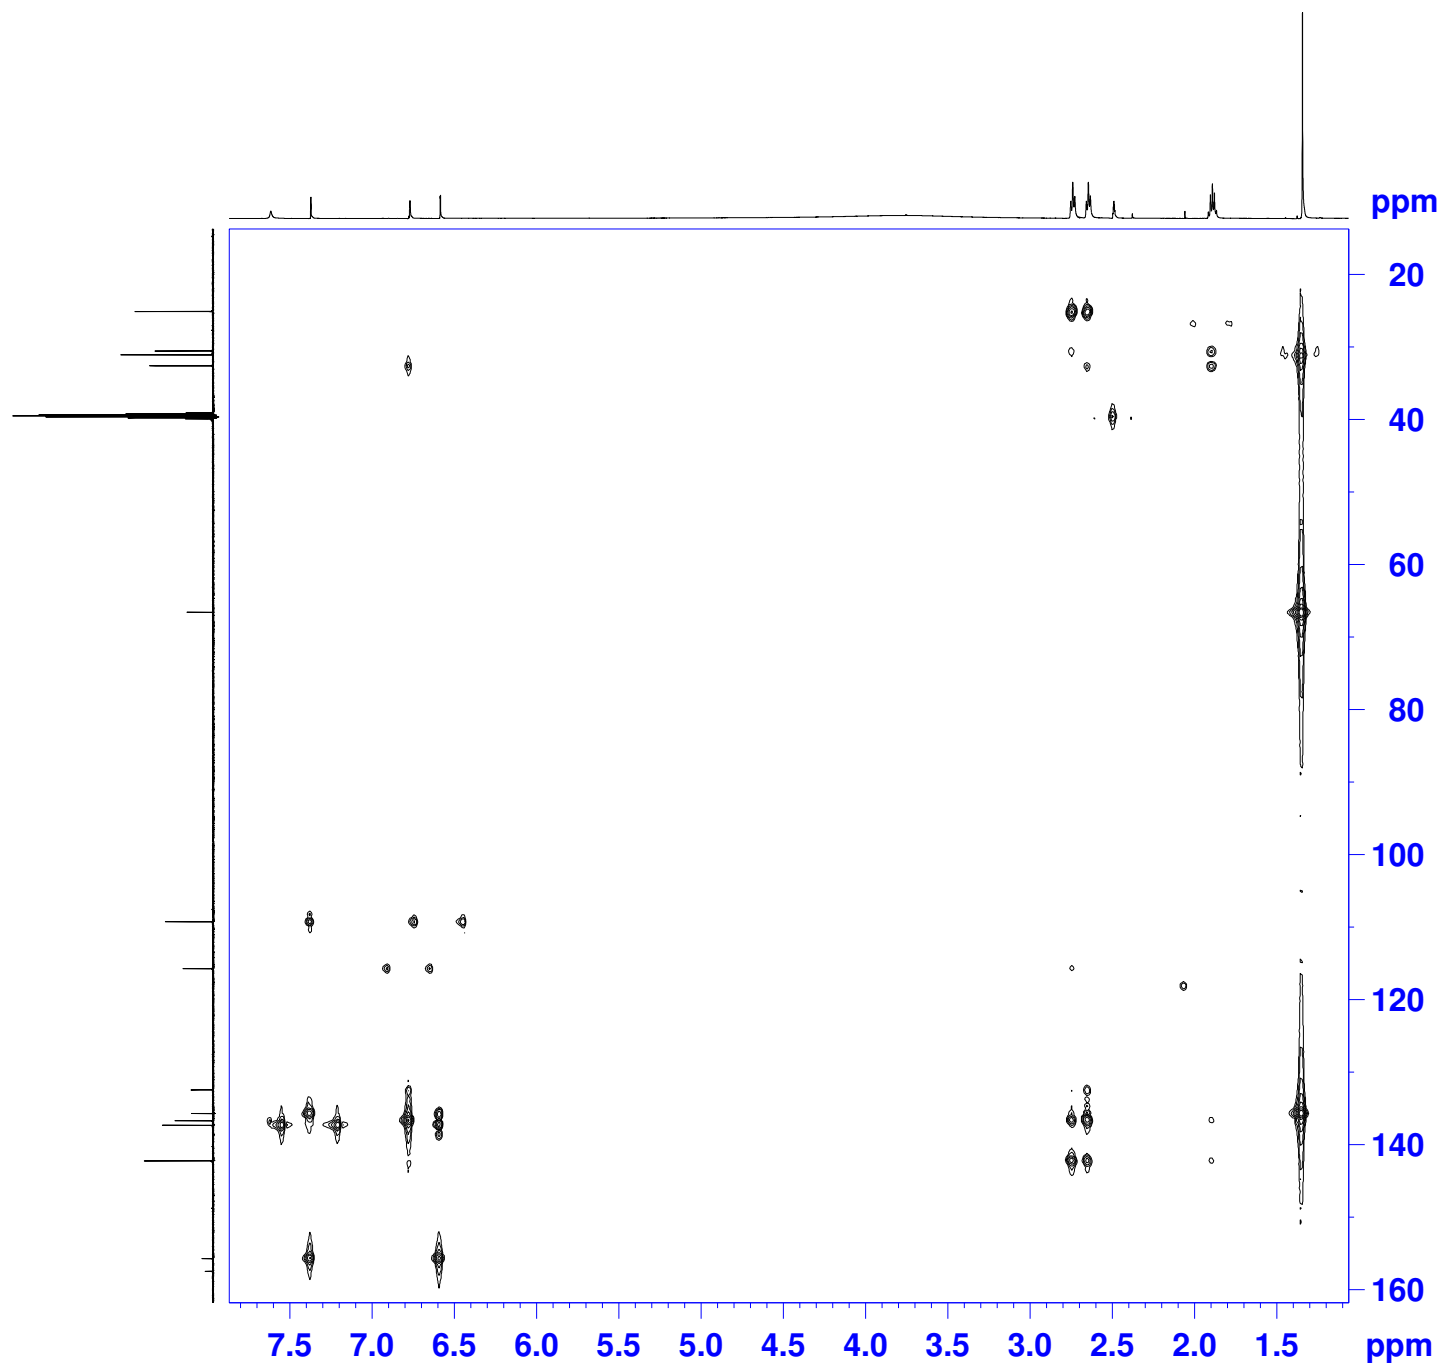

```
NAME          MCC950_004
EXPNO         12
PROCNO        1
Date_         20141021
Time          15.51
INSTRUM       spect
PROBHD        5 mm CPTCI 1H/
PULPROG       hmbcgplpndgf
TD            4096
SOLVENT       DMSO
NS            4
DS            16
SWH           7183.908 Hz
FIDRES        1.753884 Hz
AQ            0.2852012 sec
RG            29193
DW            69.600 usec
DE            12.00 usec
TE            298.0 K
CNST2         135.0000000
CNST13        8.0000000
D0            0.00000300 sec
D1            2.00000000 sec
D2            0.00370370 sec
D6            0.06250000 sec
D16           0.00020000 sec
IN0           0.00001380 sec

===== CHANNEL f1 =====
NUC1          1H
P1            7.80 usec
P2            15.60 usec
PL1           2.00 dB
PL1W          9.65199947 W
SFO1          600.1330006 MHz

===== CHANNEL f2 =====
NUC2          13C
P3            12.00 usec
PL2           -2.40 dB
PL2W          120.04185486 W
SFO2          150.9178988 MHz

===== GRADIENT CHANNEL =====
GPNAM1        sine.100
GPNAM2        sine.100
GPNAM3        sine.100
GPZ1          50.00 %
GPZ2          30.00 %
GPZ3          40.10 %
P16           1000.00 usec
ND0           2
TD            256
SFO1          150.9179 MHz
FIDRES        141.484116 Hz
SW            239.998 ppm
FnMODE        QF
SI            1024
SF            600.1299890 MHz
WDW           QSINE
SSB           2
LB            0.00 Hz
GB            0
PC            1.00
SI            1024
MC2           QF
SF            150.9028566 MHz
WDW           QSINE
SSB           2
LB            0.00 Hz
GB            0
```

**Supplementary Figure 6**  
MCC950 inhibits NLRP3 activation in HMDM and PBMC and in BMDM in response to MSU

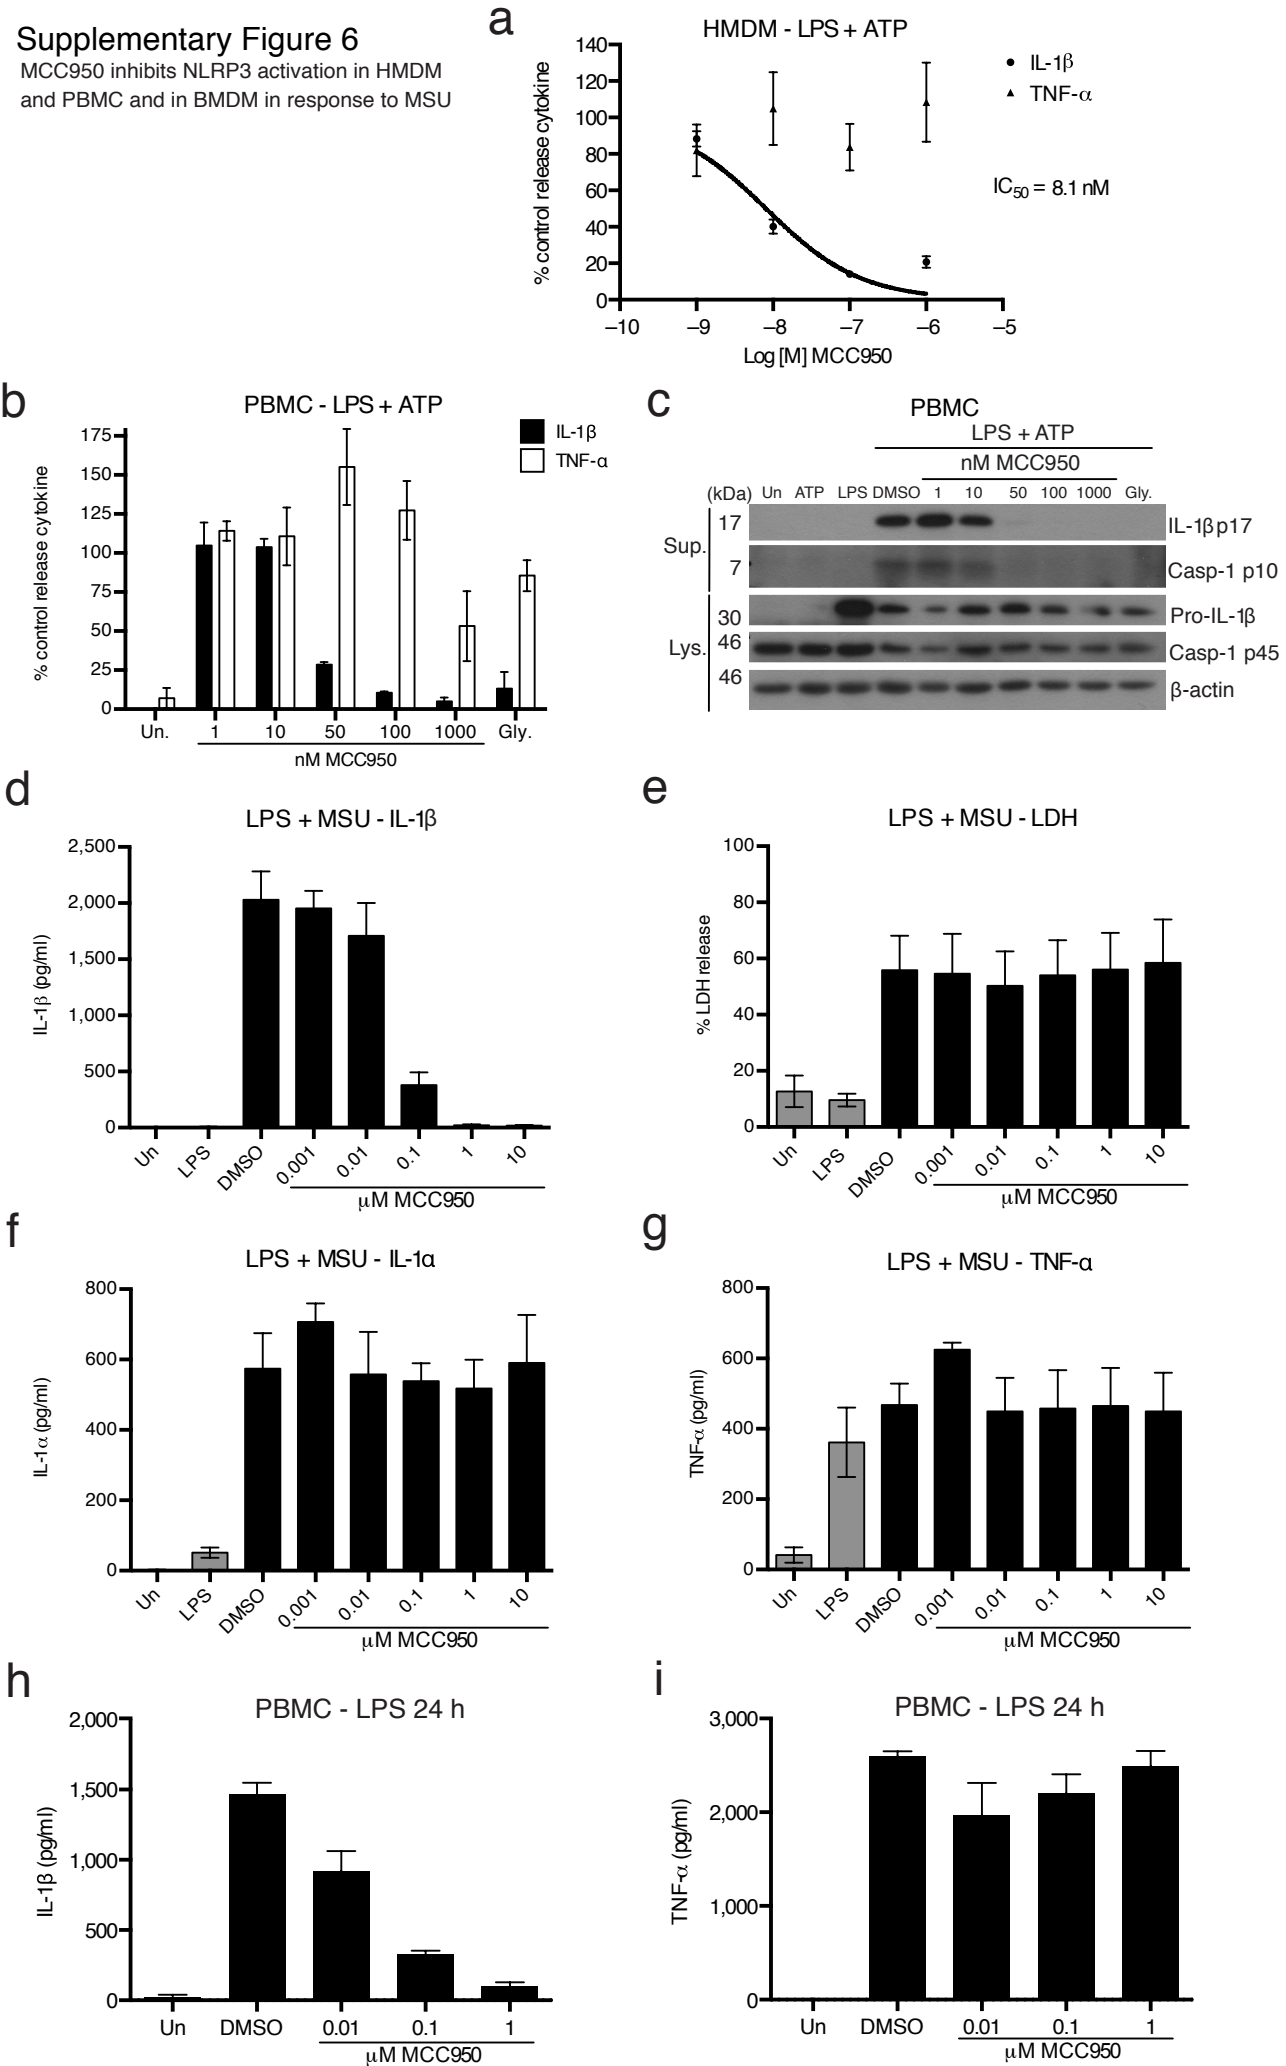

Supplementary Figure 7  
MCC950 blocks NLRP3-dependent ASC speck formation

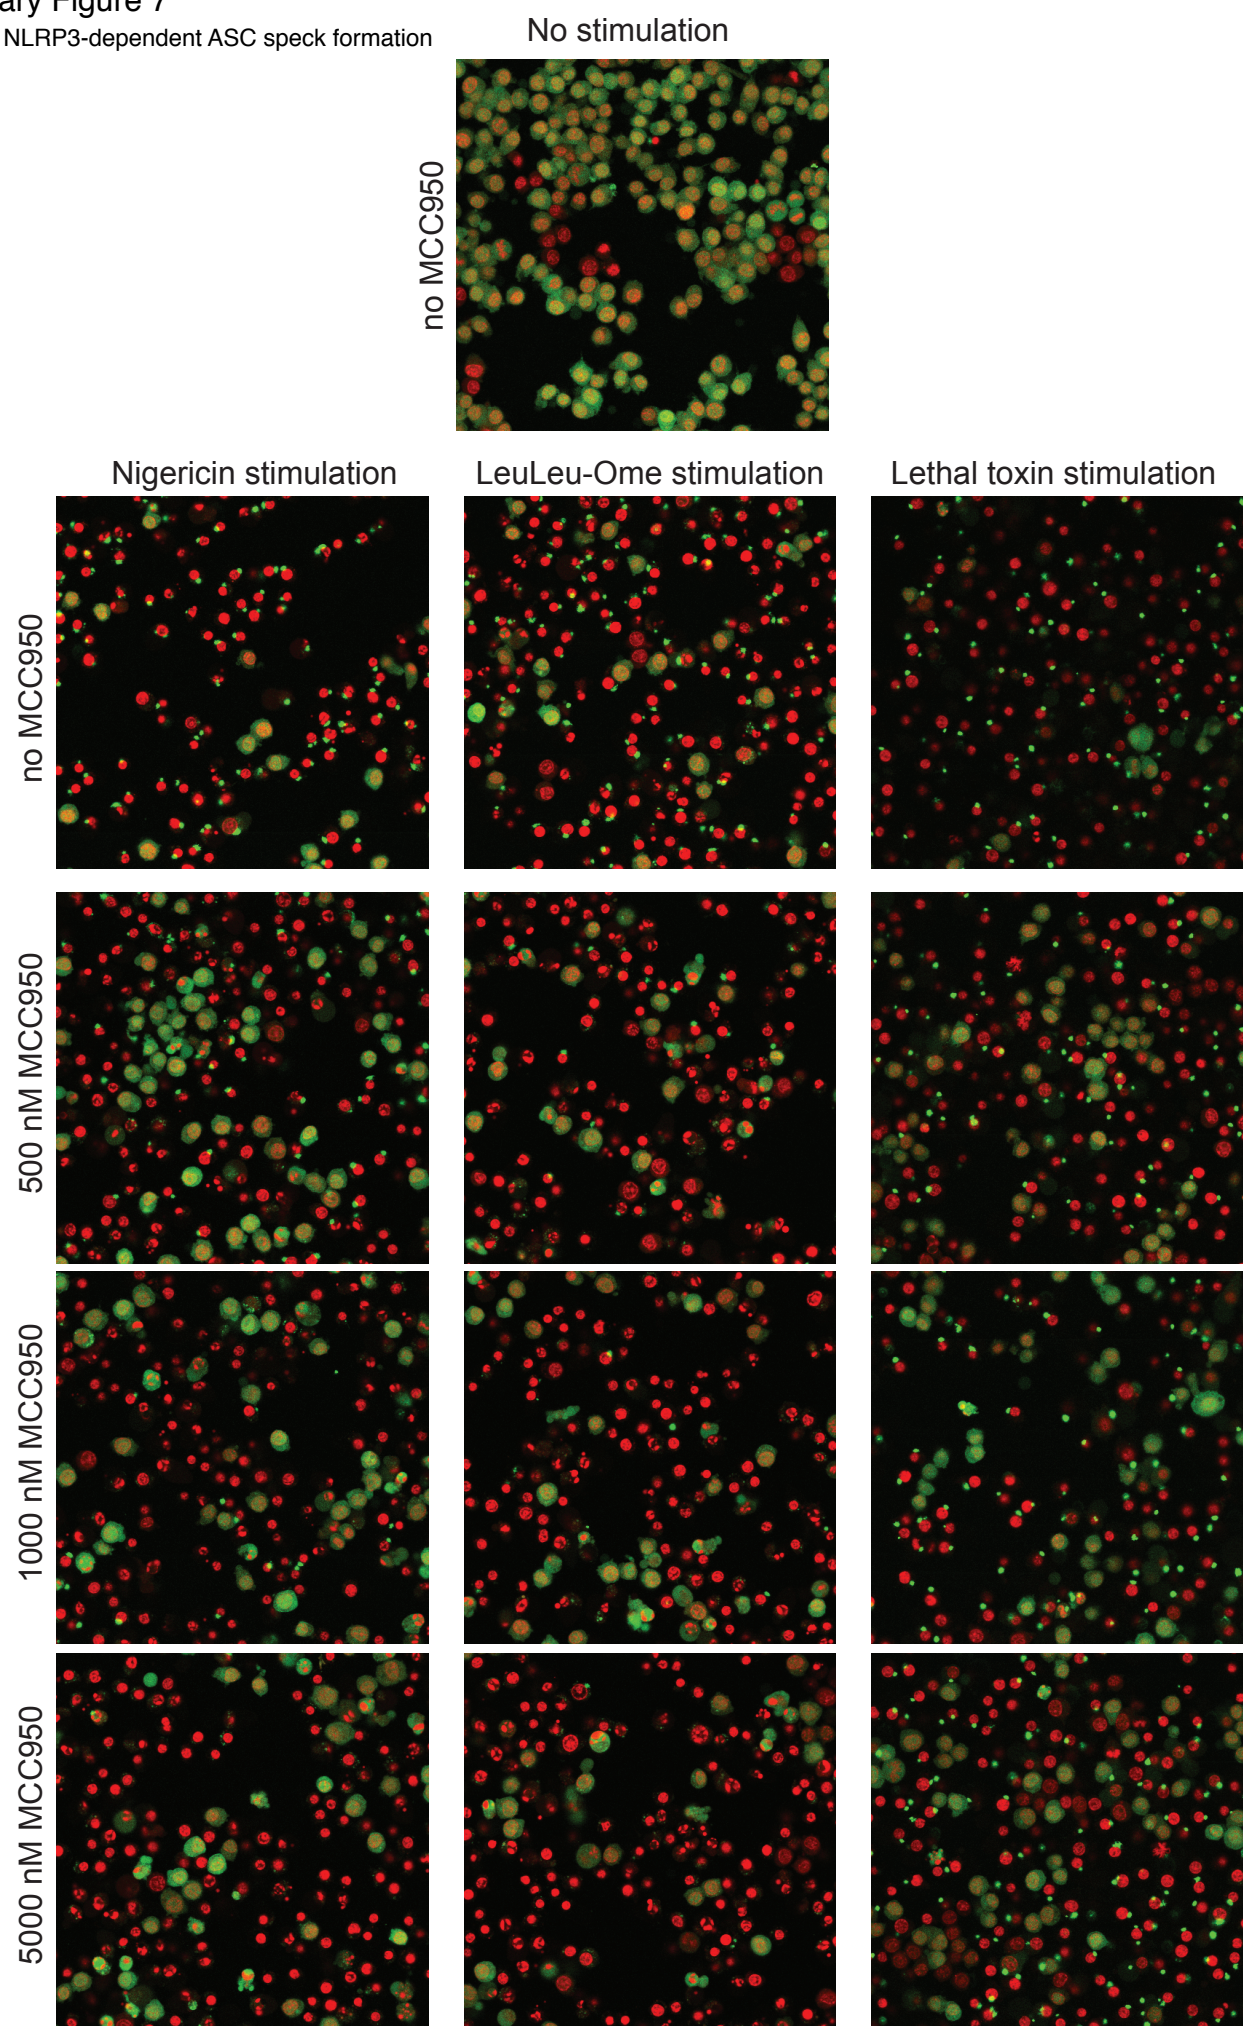

Supplementary Figure 8  
MCC950 inhibits NLRP3 activation in PBMC from individuals with MWS *ex vivo*

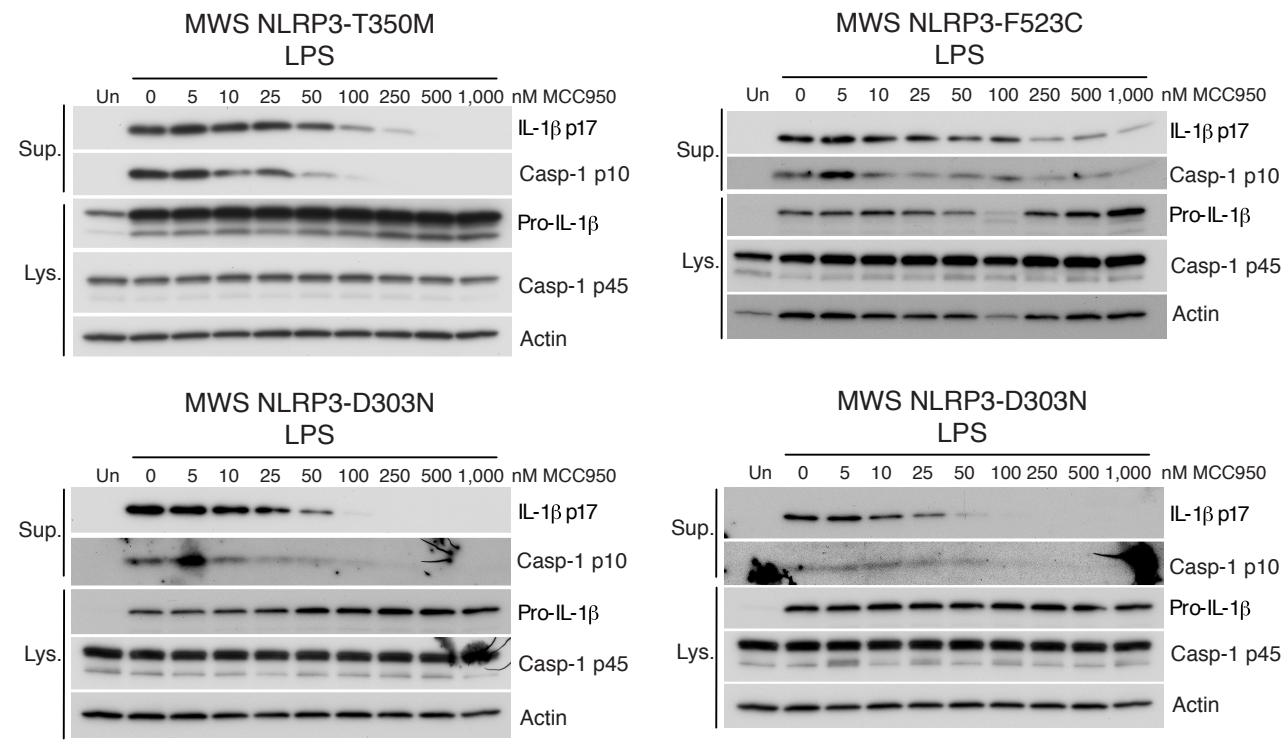

# Supplementary Figure 9

Pharmacokinetics of MCC950

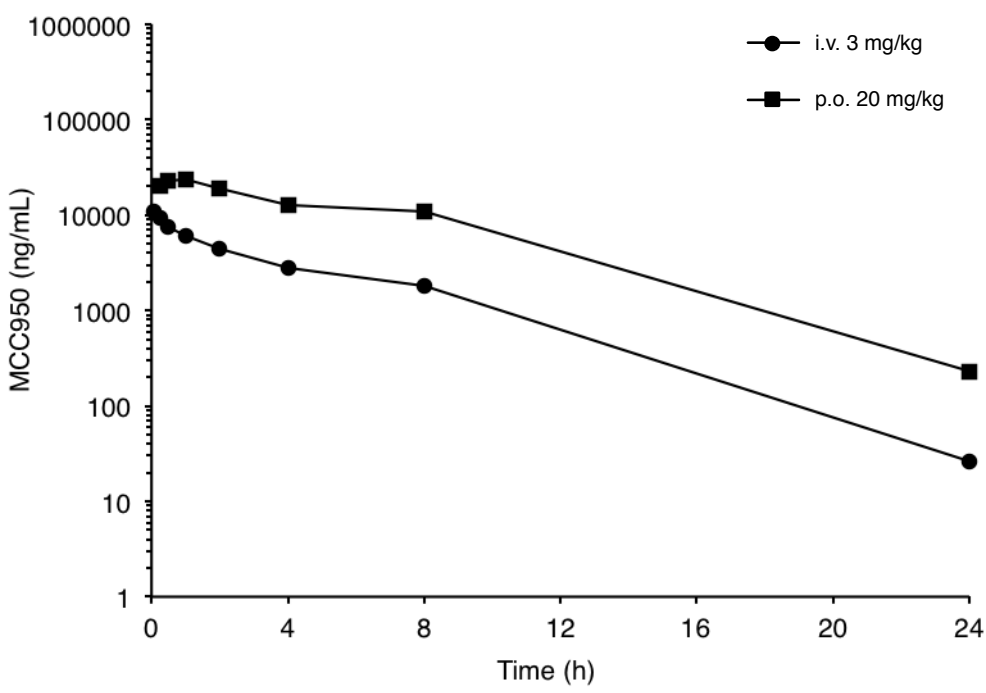

## Supplementary Table 1. MCC950 structural assignments

Structural assignments from NMR Data of MCC950 recorded in DMSO-*d*<sub>6</sub>

| position                                | <sup>13</sup> C δ <sub>C</sub> (ppm) | <sup>1</sup> H δ <sub>H</sub> (mult., J (Hz)) | HMBC (H to C) (w = weak)                          |
|-----------------------------------------|--------------------------------------|-----------------------------------------------|---------------------------------------------------|
| <b>furan</b>                            |                                      |                                               |                                                   |
| 2                                       | 155.7                                |                                               |                                                   |
| 3                                       | 137.3                                | 7.37 (d, 0.9)                                 | C2, C4, C5,                                       |
| 4                                       | 135.7                                |                                               |                                                   |
| 5                                       | 109.3                                | 6.58 (d, 0.9)                                 | C2, C3, C4, C6 (w),                               |
| 6                                       | 66.6                                 |                                               |                                                   |
| 7,8                                     | 31.1                                 | 1.34 (s)                                      | C4, C6, C7/C8                                     |
| <b>urea CO</b>                          | 157.4                                |                                               |                                                   |
| <b>1,2,3,5,6,7-hexahydro-s-indacene</b> |                                      |                                               |                                                   |
| 1',7'                                   | 30.6                                 | 2.65 (t, 7.3)                                 | C2'/C6', C3'/C5'(w), C3a'/C4a', C7a'/C8a', C8'    |
| 2',6'                                   | 25.1                                 | 1.89 (tt, 7.3, 7.3)                           | C1'/C7', C3'/C5', C2a'/C6a' (w), C7a'/C8a'(w)     |
| 3',5''                                  | 32.6                                 | 2.74 (t, 7.3)                                 | C2'/C6', C1'/C7'(w), C3a'/C4a', C7a'/C8a', C4'(w) |
| 3a',4a'                                 | 142.2                                |                                               |                                                   |
| 4'                                      | 115.7                                | 6.77 (s)                                      | C3a'/C4a', C3'/C5'                                |
| 7a',8a'                                 | 136.7                                |                                               |                                                   |
| 8'                                      | 132.4                                |                                               |                                                   |
| 8'-NH                                   |                                      | 7.61 (br s)                                   | C7a'/C8a' (w)                                     |

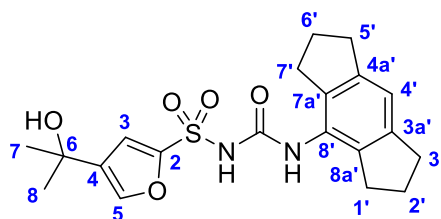

**MCC950**

Supplementary Table 2 Microsomal stability of MCC950

|              | Human liver microsomes |                     | Mouse liver microsomes |                     |
|--------------|------------------------|---------------------|------------------------|---------------------|
|              | T1/2 (min)             | Remaining (T=60min) | T1/2 (min)             | Remaining (T=60min) |
| MCC950       | 108.3                  | 70.8%               | >145                   | 79.1%               |
| Testosterone | 9.7                    | 1.3%                | 2.3                    | 0.5%                |
| Diclofenac   | 7.2                    | 0.4%                | 39.6                   | 39.1%               |
| Propafenone  | 3.9                    | 0.0%                | 1.0                    | 0.0%                |

Supplementary Table 3 CYP substrate preparation

| <b>CYP</b>                                                                        | <b>Substrate</b> | <b>Methanol Stock Conc.</b> | <b>Working Conc.</b> | <b>Final Assay Conc.</b> | <b>Vol.</b> |
|-----------------------------------------------------------------------------------|------------------|-----------------------------|----------------------|--------------------------|-------------|
| 1A2                                                                               | Phenacetin       | 20 mM                       | 100 $\mu$ M          | 10 $\mu$ M               | 15 $\mu$ L  |
| 2C9                                                                               | Diclofenac       | 10 mM                       | 50 $\mu$ M           | 5 $\mu$ M                | 15 $\mu$ L  |
| 2C19                                                                              | S-mephenytoin    | 30 mM                       | 300 $\mu$ M          | 30 $\mu$ M               | 30 $\mu$ L  |
| 2D6                                                                               | Dextromethorphan | 10 mM                       | 50 $\mu$ M           | 5 $\mu$ M                | 15 $\mu$ L  |
| 3A4                                                                               | Midazolam        | 10 mM                       | 20 $\mu$ M           | 2 $\mu$ M                | 6 $\mu$ L   |
| <b>2919 <math>\mu</math>L Phosphate buffer added to give total volume of 3 mL</b> |                  |                             |                      |                          |             |

Supplementary Table 4 Effect of MCC950 on CYP

| <b>CYP</b> | <b>Metabolite</b>     | <b>control cpd (3 <math>\mu</math>M)<br/>% inhibition</b> |      | <b>MCC950 (10 <math>\mu</math>M)<br/>%inhibition</b> |
|------------|-----------------------|-----------------------------------------------------------|------|------------------------------------------------------|
| 1A2        | Acetaminophen         | $\alpha$ -Naphthoflavone                                  | 93.8 | 5.2                                                  |
| 2C9        | 4'-hydroxydiclofenac  | Sulfaphenazole                                            | 87.4 | 14.7                                                 |
| 2C19       | 4'-hydroxymephenytoin | N-3-benzylnirvanol                                        | 93.5 | 5.0                                                  |
| 2D6        | Dextrorphan           | Quinidine                                                 | 96.1 | 4.2                                                  |
| 3A4        | 1'-hydroxymidazolam   | Ketoconazole                                              | 98.8 | 3.0                                                  |

Supplementary Table 5 Effect of MCC950 on the hERG channel

| Sample        | IC50(μM) | SD (μM) | HillSlope | N |
|---------------|----------|---------|-----------|---|
| Amitriptyline | 3.55     | 0.028   | 0.81      | 2 |
| MCC950        | >30      |         | 0.21      | 3 |

## Supplementary Methods

### Microsomal stability

MCC950 or control compound DMSO stock solution (10 mM) was diluted with 50% aq methanol to a concentration of 100  $\mu$ M. A 50  $\mu$ L aliquot of this solution was diluted using potassium phosphate buffer to a concentration of 10  $\mu$ M. MCC950, compound control or blank solution (10  $\mu$ L) was incubated at 37 °C with human or mouse liver microsomes (80  $\mu$ L of 0.7 mg protein/mL phosphate buffer) for 10 min before addition of NADPH regenerating system (10  $\mu$ L) to start the reaction. Reactions were stopped at 0, 5, 10, 20, 30 and 60 min time-points by addition of 300  $\mu$ L cold acetonitrile (containing tolbutamide as internal standard at 100 ng/mL) and centrifuged at 4,000 rpm for 20 min. The supernatant (100  $\mu$ L) was added to water (300  $\mu$ L) and analyzed by LC/MS/MS. The ratio of peak area of test compound remaining/internal standard was used to determine reduction in concentration of test compound over time. The half-life ( $T_{1/2}$ ) and % compound remaining after 60 min were then calculated.

### Cytochrome P450 inhibition

A working stock solution of MCC950 (10 mM in DMSO) was diluted using phosphate buffer to a concentration of 100  $\mu$ M. Five inhibitor stock solutions were prepared at a concentration of 3 mM in DMSO:  $\alpha$ -naphthoflavone, sulfaphenazole, *N*-3-benzylrivanol, quinidine and ketoconazole. The inhibitor stocks were diluted using phosphate buffer to a concentration of 30  $\mu$ M. A cocktail of substrates (phenacetin, diclofenac, S-mephenytoin, dextromethorphan and midazolam) for 5 major CYP isozymes (1A2, 2C9, 2C19, 2D6 and 3A4) was prepared by dilution of methanol stock solutions using phosphate buffer as shown in Supplementary Table 3. MCC950, known inhibitor or blank solution (20  $\mu$ L of working stock solution) and substrate cocktail solution (20  $\mu$ L) were incubated at 37 °C with human liver microsomes (140  $\mu$ L of 0.286 mg/mL in phosphate buffer) for 10 min prior to addition of the co-factor NADPH (20  $\mu$ L of 10 mM solution in 33 mM  $MgCl_2$ ). Incubation was continued and aliquots were removed at 0, 5, 10, 20, 30 and 60 min then mixed with cold acetonitrile (containing tolbutamide as internal MS standard at 200 ng/mL) and centrifuged at 4,000 rpm for 20 min. The supernatant was analyzed by LC/MS/MS to determine the peak area of metabolite and internal standard. Peak areas determined in the presence and absence of test compound were used to determine % inhibition.

### hERG channel assay

Automated patch clamp method (QPatch<sup>HTX</sup>) was used at WuXi AppTech to evaluate the effects of MCC950 on the hERG potassium channel. CHO cells that stably express hERG potassium channels from Aviva Biosciences were used. The  $IC_{50}$  of MCC950 and amitriptyline as positive control on whole cell hERG currents were determined.

## Pharmacokinetics

Single dose pharmacokinetic parameters were determined at WuXi AppTech using fasted male C57BL/6 mice (3 mice per group, 2 groups). Groups were dosed i.v. (3 mg/kg) or p.o. (20 mg/kg) and blood samples taken *via* submandibular or saphenous vein at the following time points post dosing: 0.083 (i.v. only), 0.25, 0.5, 1, 2, 4, 8 and 24 h. An aliquot of 7  $\mu$ L of blood plasma was protein precipitated with 70  $\mu$ L internal standard solution (100 ng/mL diclofenac & 100 ng/mL tolbutamide in MeOH), the mixture was vortex-mixed for 1 min and centrifuged at 13,000 rpm for 15 min. The supernatant (70  $\mu$ L) was then mixed with 210  $\mu$ L water/methanol (v:v, 50:50), vortex-mixed for 15 min and centrifuged at 4,000 rpm for 10 min at 4 °C. The concentration of MCC950 in the plasma samples was determined using LC-MS/MS with the peak areas compared to a calibration curve determined using 3-3,000 ng/mL MCC950 in male C57BL/6 mouse plasma.
